# Supplementary material for: Clinical utility of genomic profiling of AML using paraffin‐embedded bone marrow clots: HM‐SCREEN‐Japan 01
Source: PubMed Central journal article supplement — Cancer Sci. 2023 Mar 1;114(5):2098–108. doi: 10.1111/cas.15746 (PMC10154825; doi:10.1111/cas.15746), 2023-03-01

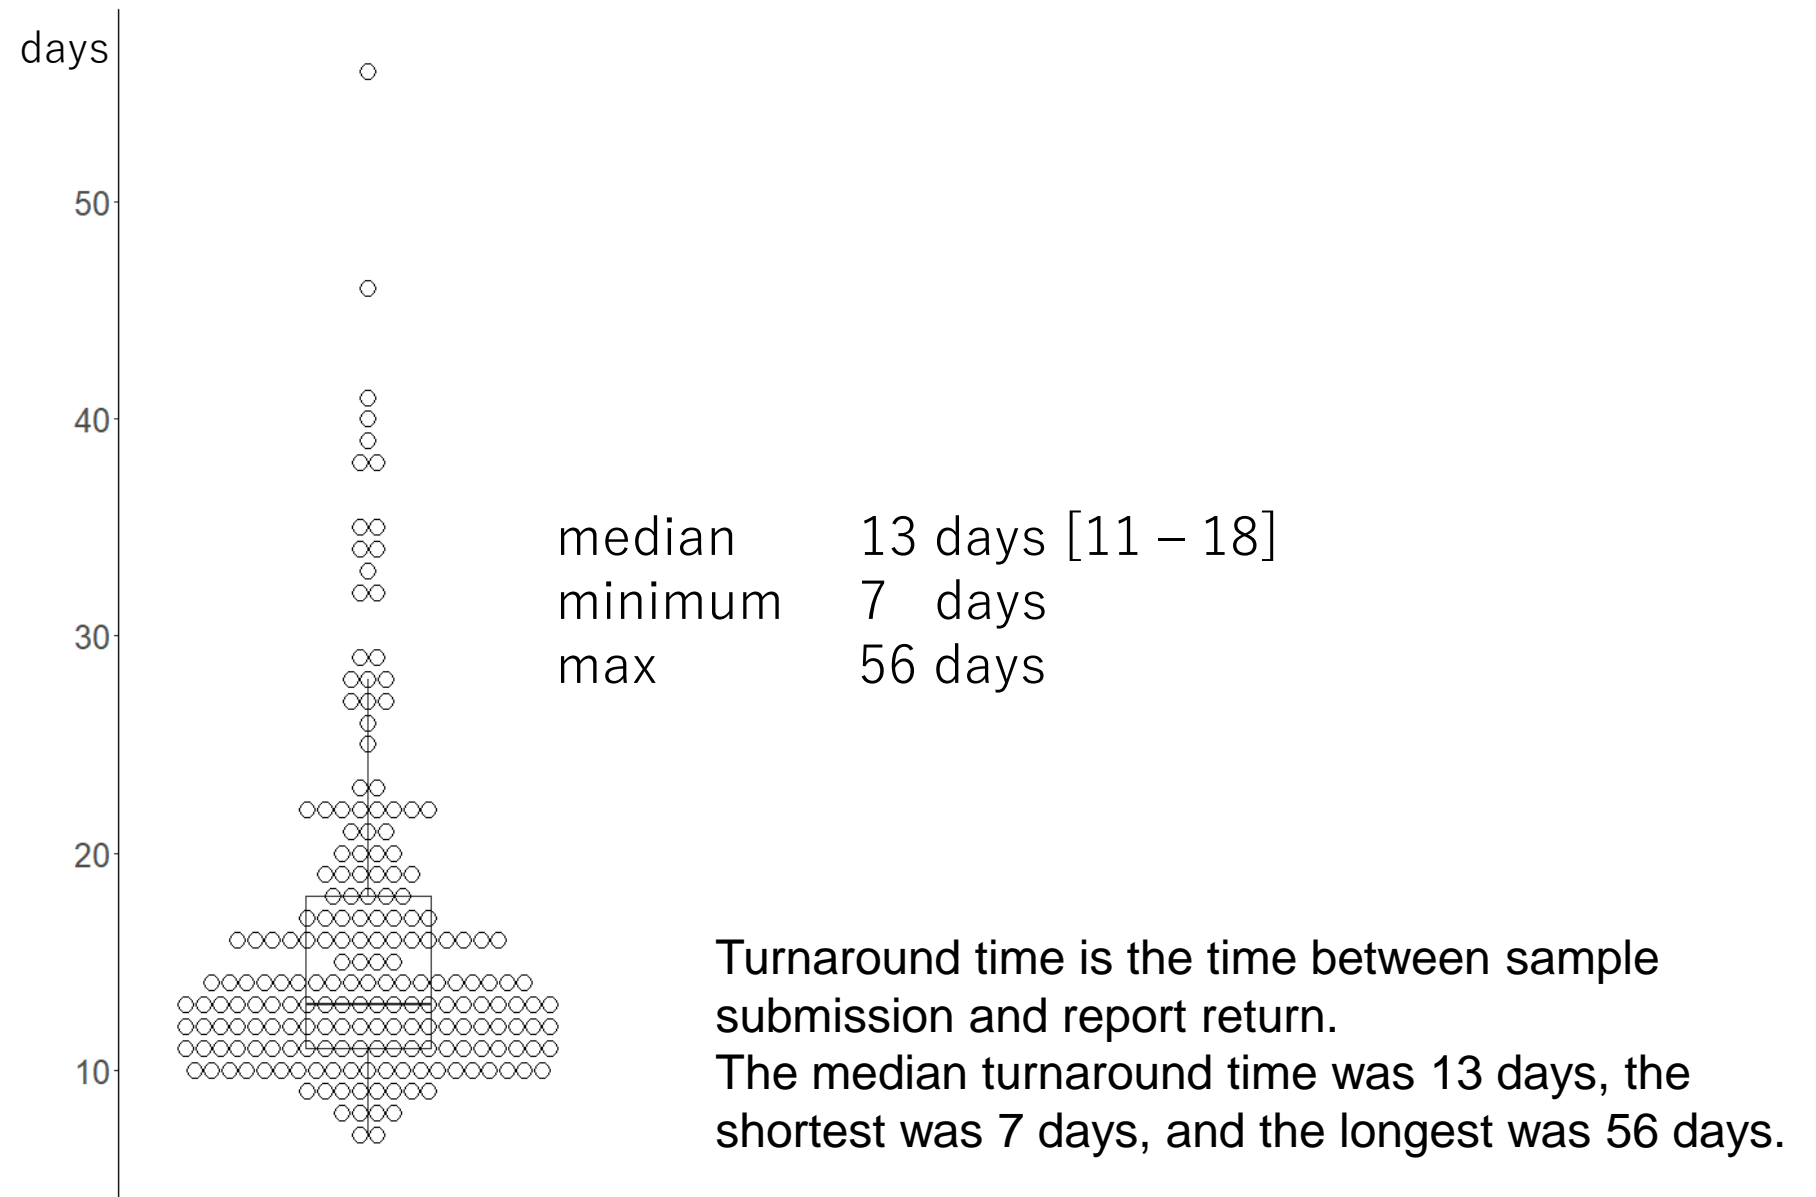

|                       |                       |              | NGS      |              | Cohen's κ |
|-----------------------|-----------------------|--------------|----------|--------------|-----------|
|                       |                       |              | Detected | Not Detected |           |
| G-banding karyotyping | CBF fusion transcript | Detected     | 16       | 2            | 0.90      |
|                       |                       | Not Detected | 1        | 146          |           |
|                       | KMT2A-rearrangement   | Detected     | 8        | 1            | 0.83      |
|                       |                       | Not Detected | 2        | 154          |           |
|                       | Total                 | Detected     | 24       | 3            | 0.87      |
|                       |                       | Not Detected | 3        | 135          |           |

The fusion genes used in the evaluation are as follows,  
 CBF fusion transcript, t(8;21)(q22;q22.1);RUNX1-RUNX1, inv(16)(p13.1;q22) or t(16;16)(p13.1;q22);CBFB-MYH11  
 KMT2A-rearrangement, t(9;11)(p21.3;q23.3);KMT2A-MLLT3, t(11;19)(q23;q13.1);KMT2A-MLLT1, t(10;11)(p12;q23);KMT2A-MLLT10, t(1;11)(q21;q23);KMT2A-MLLT11, t(6;11)(q27;q23);KMT2A-MLLT4, t(X;11)(q13;q23);KMT2A-SEPT6 t(11;17)(11;17);KMT2A-SEPT9

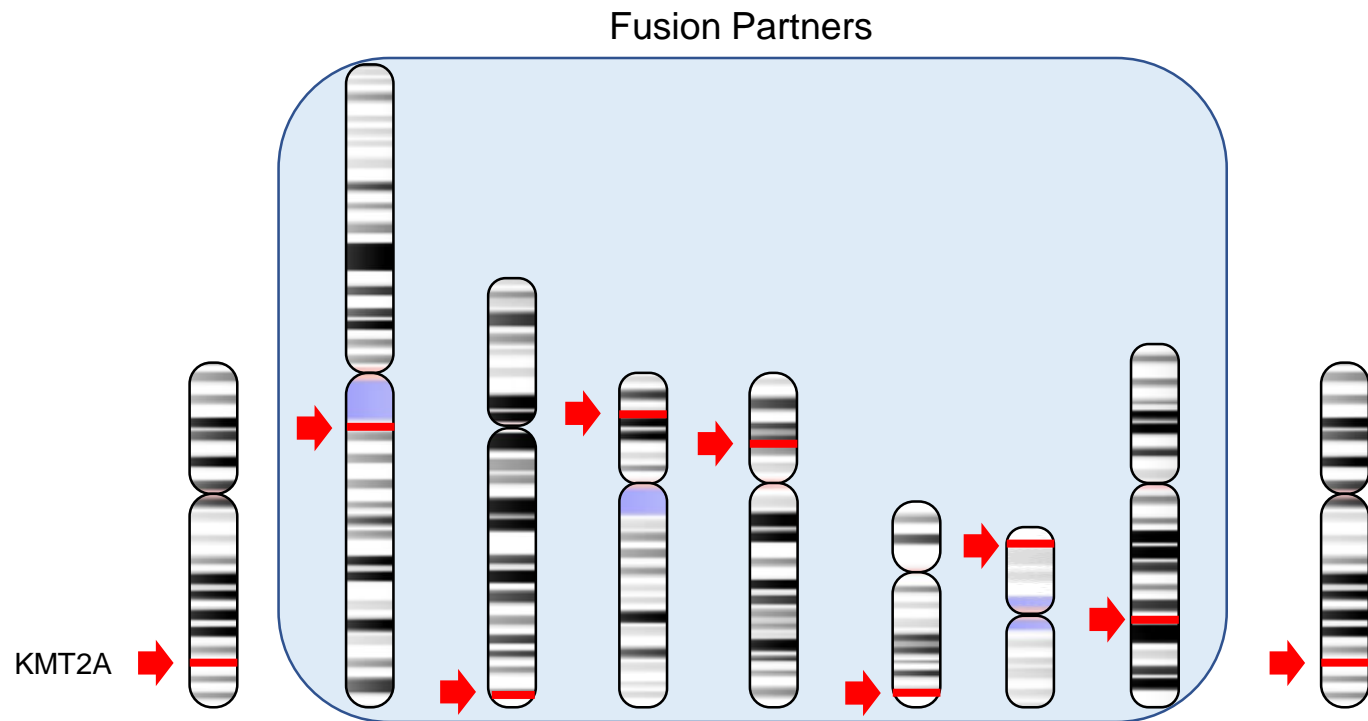

|                                  |              |          |          |          |          |          |          |          |                            |
|----------------------------------|--------------|----------|----------|----------|----------|----------|----------|----------|----------------------------|
| Chromosome                       | 11           | 1        | 6        | 9        | 10       | 17       | 19       | X        | 11                         |
| Gene                             | <i>KMT2A</i> | AF1Q     | AF6      | AF9      | AF10     | SEPT9    | ENL      | SEPT6    | Partial Tandem Duplication |
| Patients (% of all participants) |              | 1 (0.6%) | 2 (1.1%) | 3 (1.7%) | 1 (0.6%) | 1 (0.6%) | 1 (0.6%) | 1 (0.6%) | 10 (5.6%)                  |

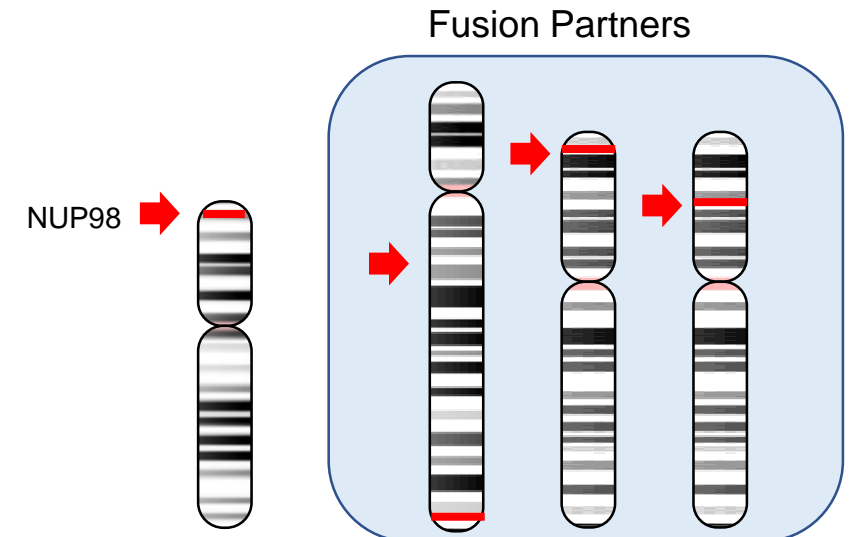

|                                  |              |          |          |          |
|----------------------------------|--------------|----------|----------|----------|
| Chromosome                       | 11           | 5        | 7        | 7        |
| Gene                             | <i>NUP98</i> | NSD1     | TNRC18   | HOXA9    |
| Patients (% of all participants) |              | 1 (0.6%) | 1 (0.6%) | 3 (1.7%) |

Red arrows indicate the site of translocation.

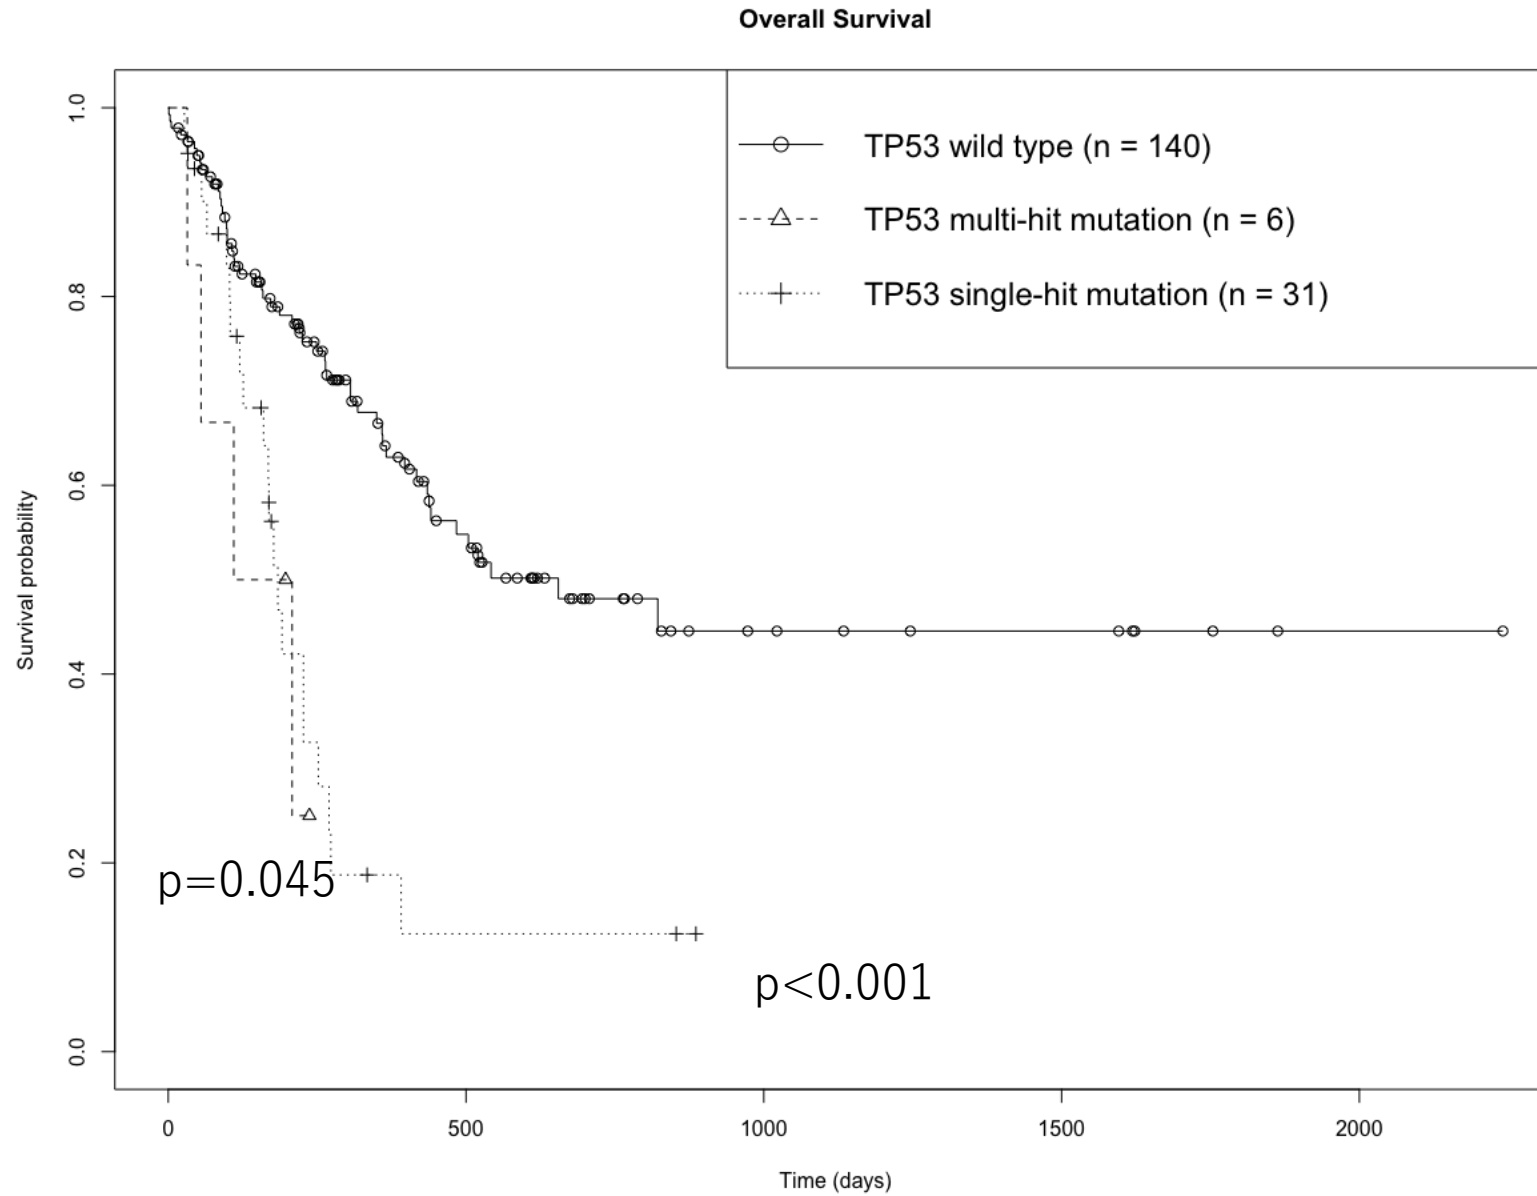

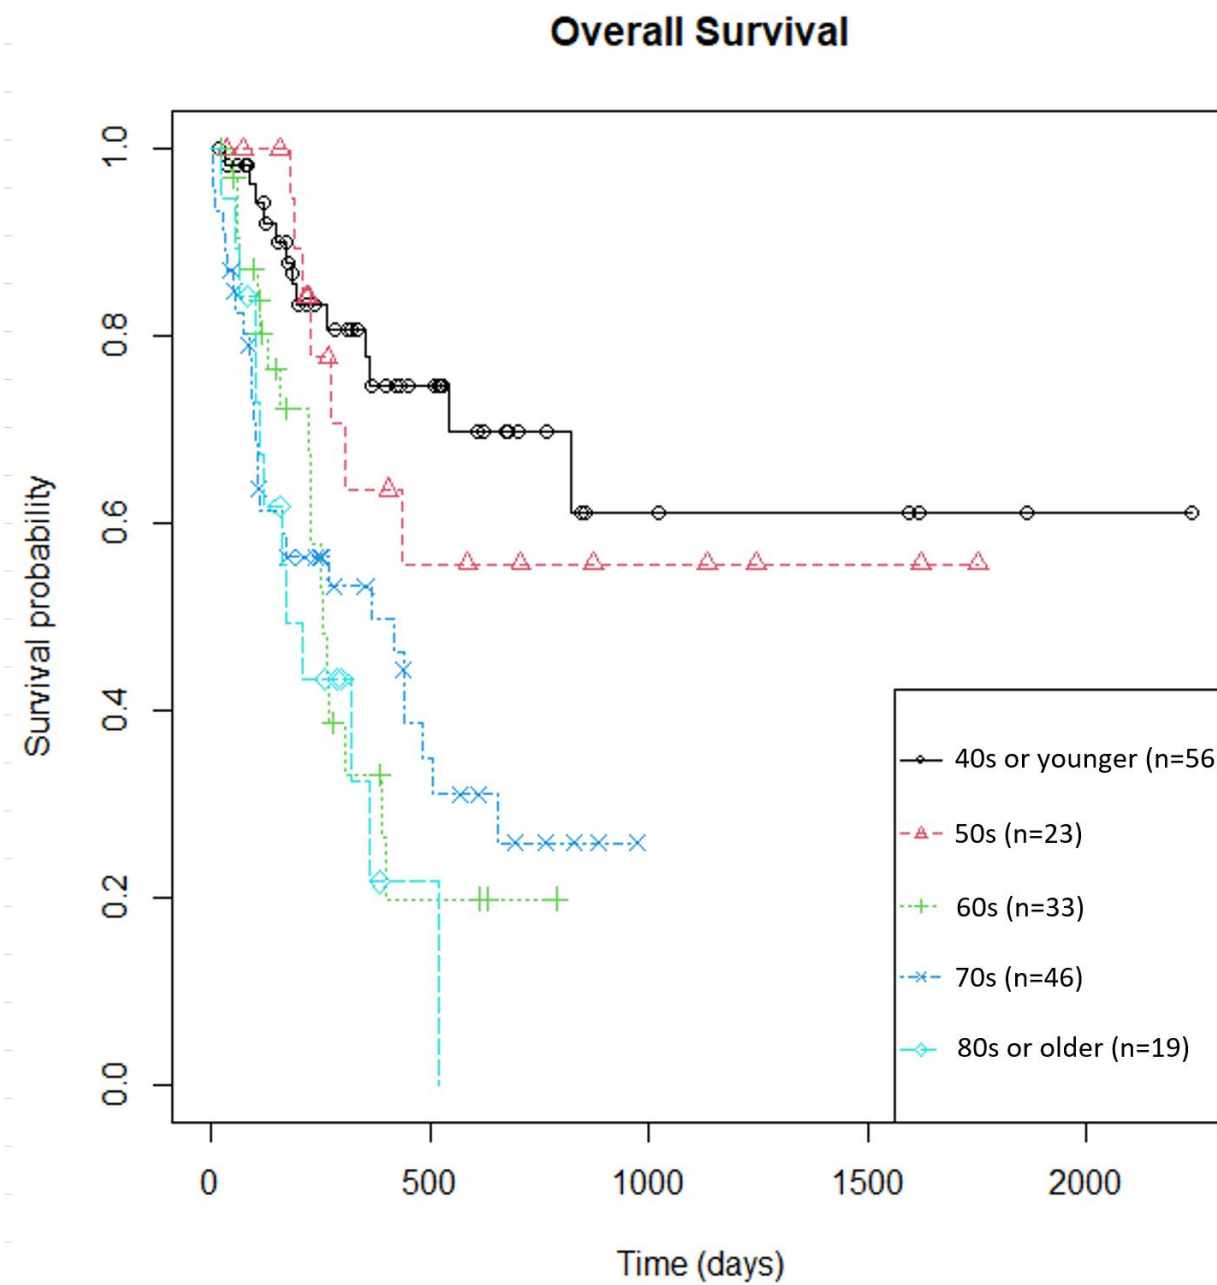

Supplement Fig. 7 Schematic overview of mutation sites of *WT1* in the analysis cohort.

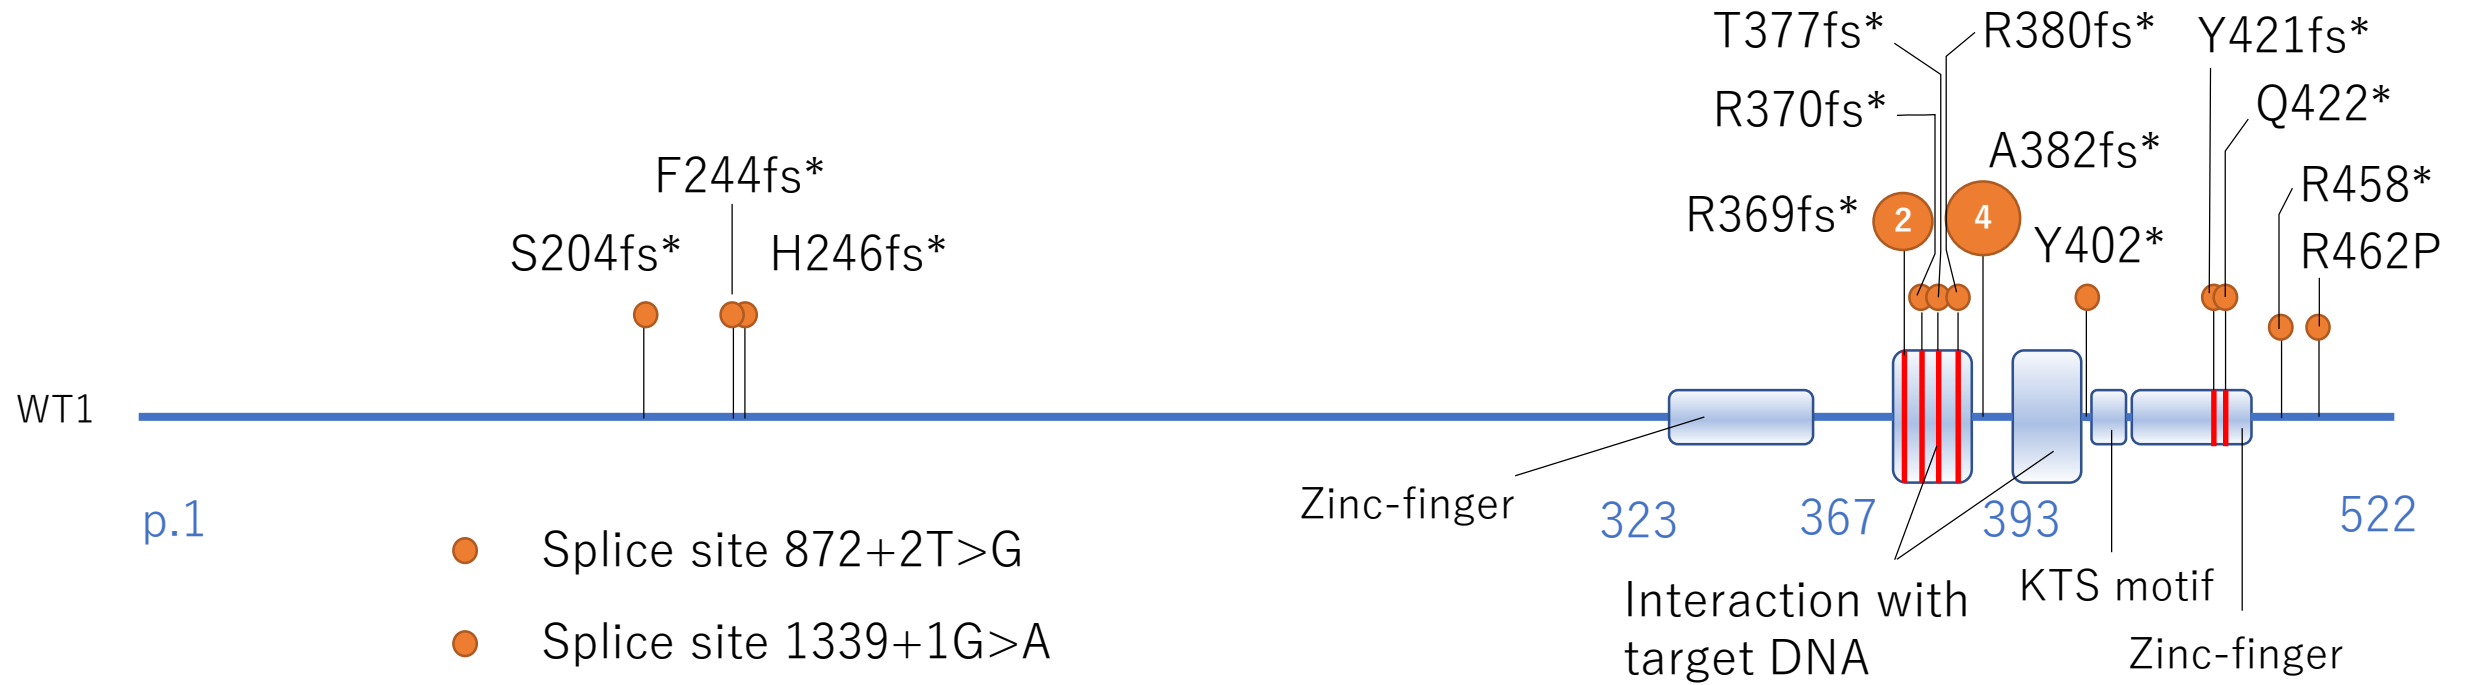

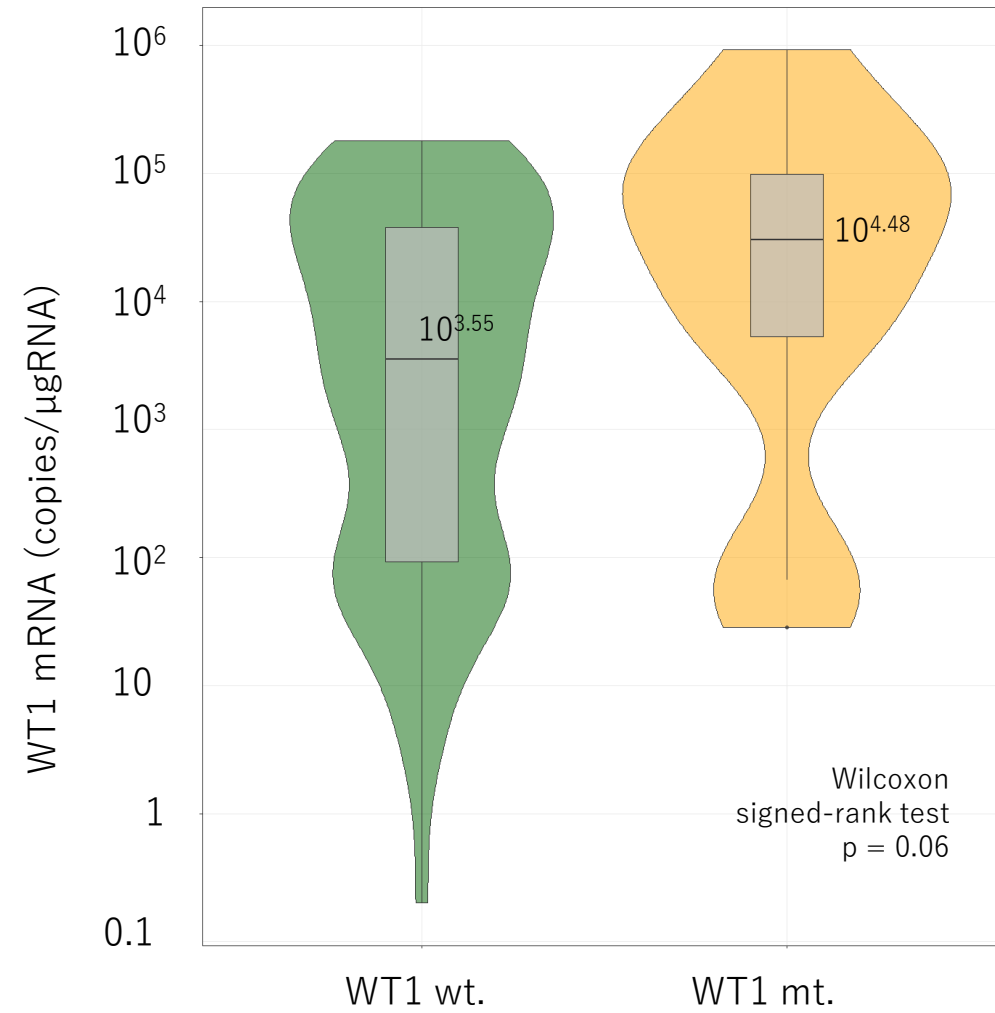

Supplement: CAS-114-2098-s001.pdf [file CAS-114-2098-s001.pdf]
